# Supplementary material
Source: HighWire-hosted journal article supplement (https://www.g3journal.org/content/suppl/2014/10/01/g3.114.011957)
Supplement: FigureS6.pdf [file FigureS6.pdf]

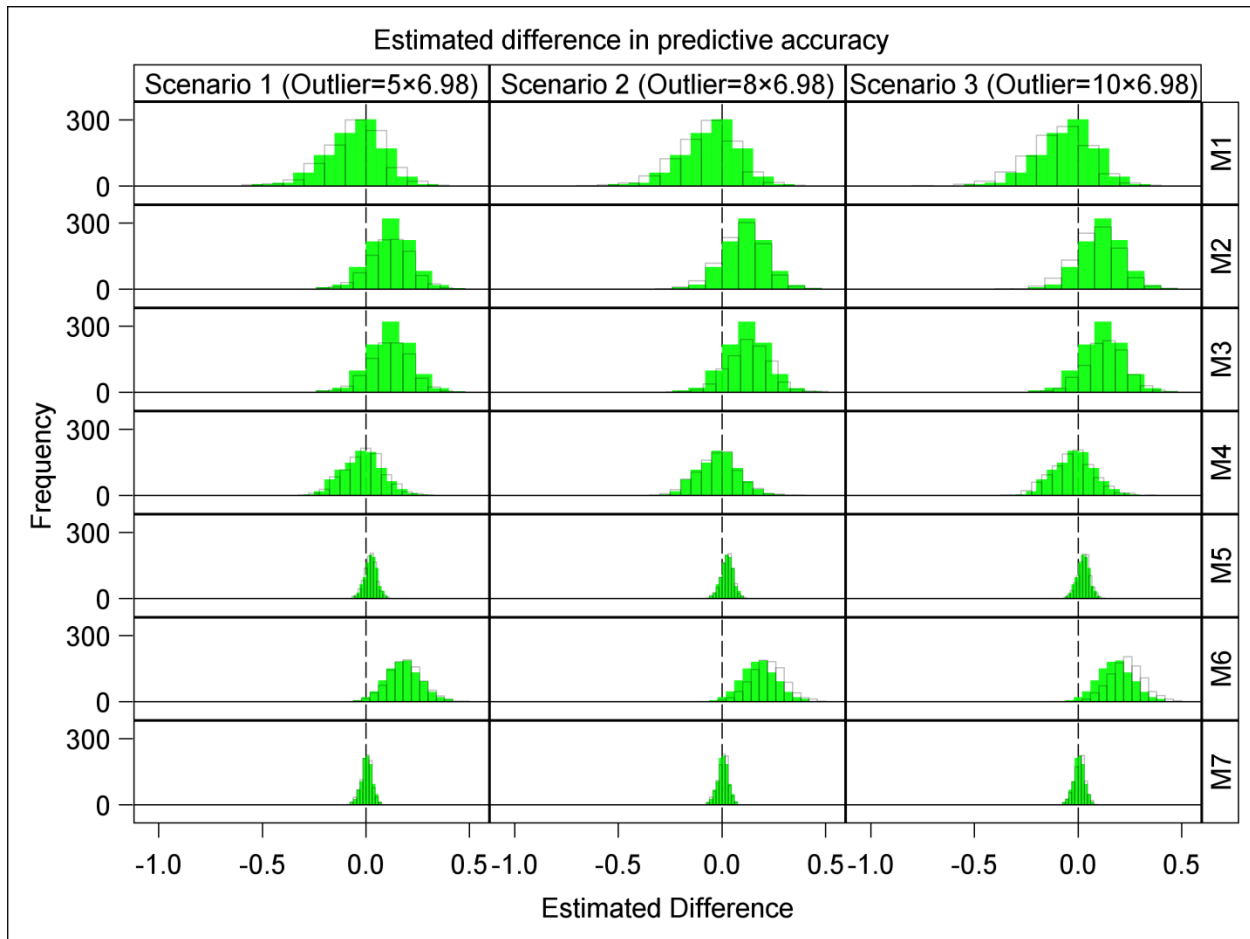

**Figure S6** Frequency histograms of the deviations in the simulated true predictive accuracy  $r_{g,\hat{g}}$  from the estimated predictive accuracy for the datasets with  $\hat{r}_{g,\hat{g},o}$  (empty box and whiskers capped with brackets) and without  $\hat{r}_{g,\hat{g}}$  (green boxes), outliers, regarded as the benchmark for each of the seven methods in Scenarios 1 to 3. All the scenarios are based on the same 1000 data sets simulated assuming 177 genotypes and a marker effect variance of 0.2019.
